# Supplementary material for: Effect of configurational isomerism and polymorphism on chalcone fluorescent properties
Source: Royal Society of Chemistry journal article supplement (doi:10.1039/c6nj00976j), 2016-01-01
Supplement: c6nj00976j1.pdf [file c6nj00976j1.pdf]

## **Supplementary material:**

### **Effect of Configurational Isomerism and Polymorphism on Chalcone Fluorescent Properties**

Ruimin Zhang, † Mingliang Wang†\*, † Hao Sun, † Arshad Khan, † Rabia Usman, †

Shengzhi Wang, † Xiantao Gu, † Jia Wang and Chunxiang Xu ‡\*

*† School of Chemistry and Chemical Engineering, Southeast University, Nanjing 211189,*

*P. R. China*

*‡ State Key Laboratory of Bioelectronics, Southeast University, Nanjing 210096, P. R.*

*China*

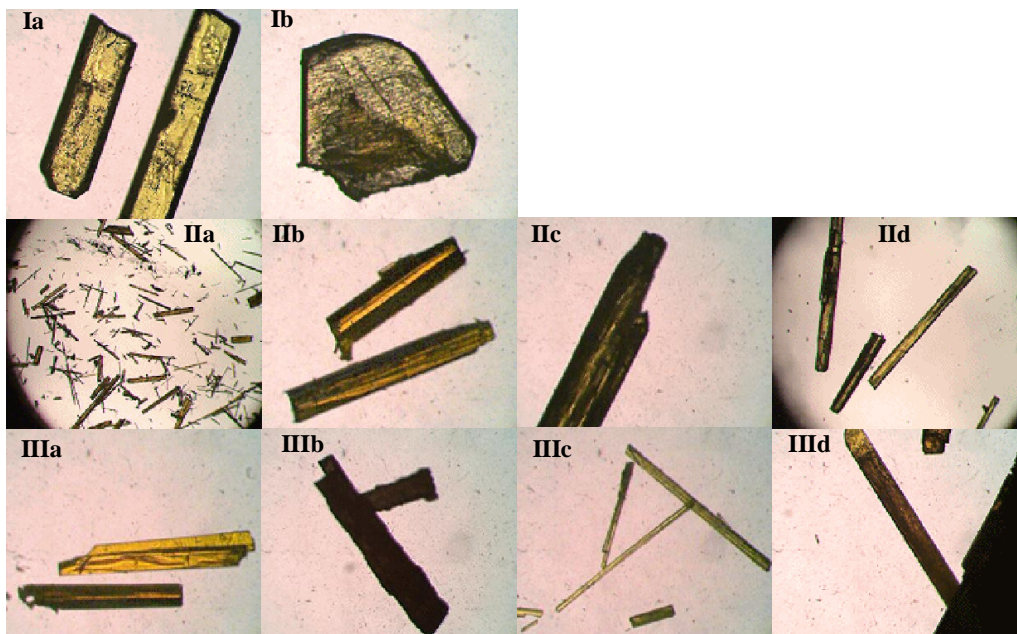

Figure S1. Microscopy graphs of all forms.

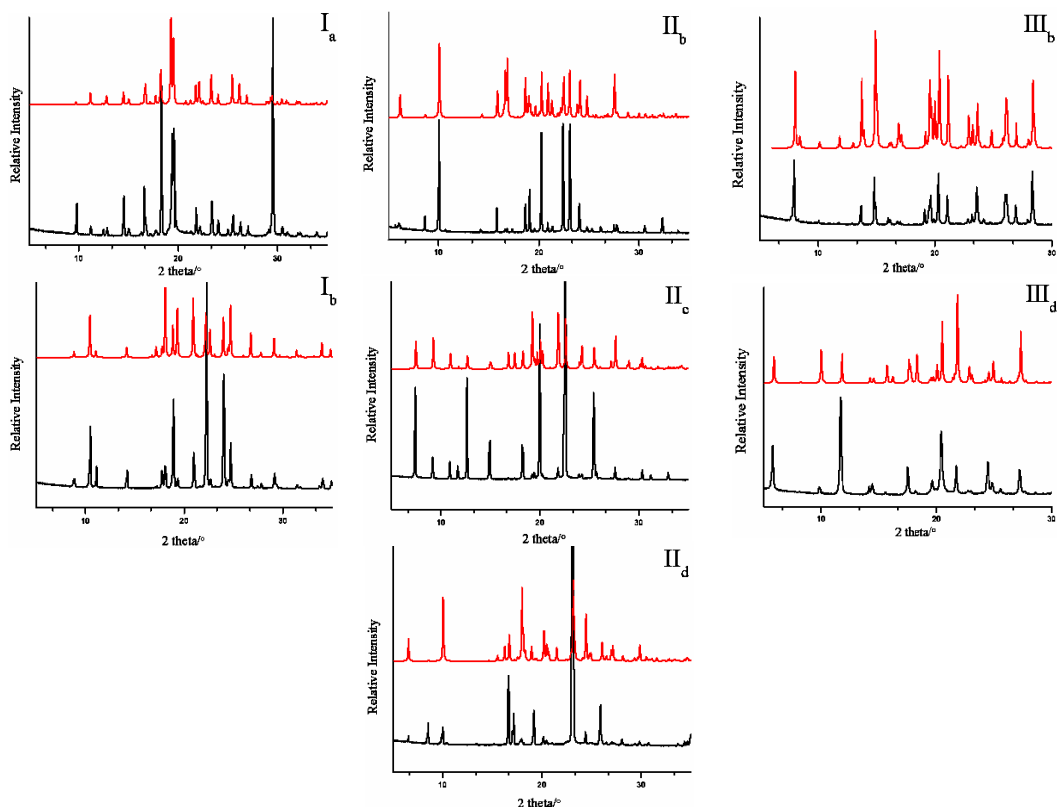

Figure S2. Comparing of PXRD experimental patterns (black) of crystals with simulated patterns (red).

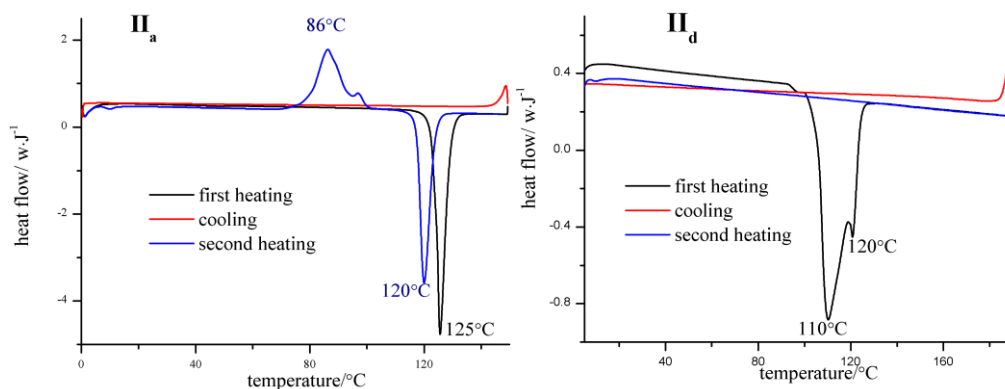

**Figure S3.** DSC measurement for  $\text{II}_a$  and  $\text{II}_c$  investigated by DSC-Q10 at  $10^{\circ}\text{C}/\text{min}$  under liquid nitrogen ( $10\text{ mL}/\text{min}$ )

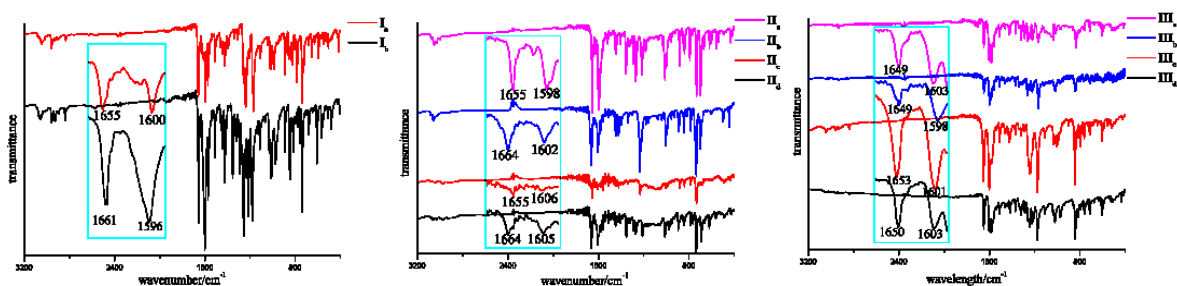

**Figure S4.** IR spectra of crystals.

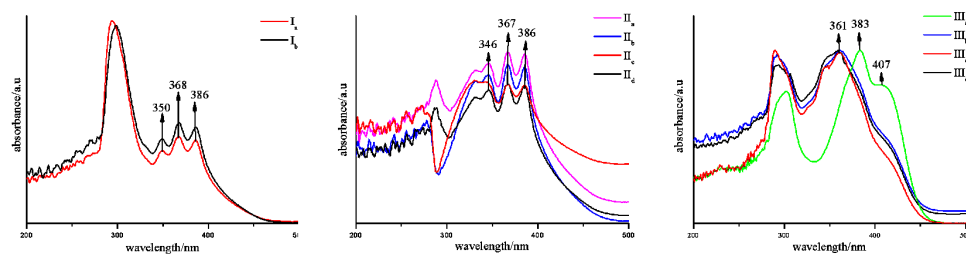

**Figure S5.** Absorption spectra of crystals in acetonitrile solvent.

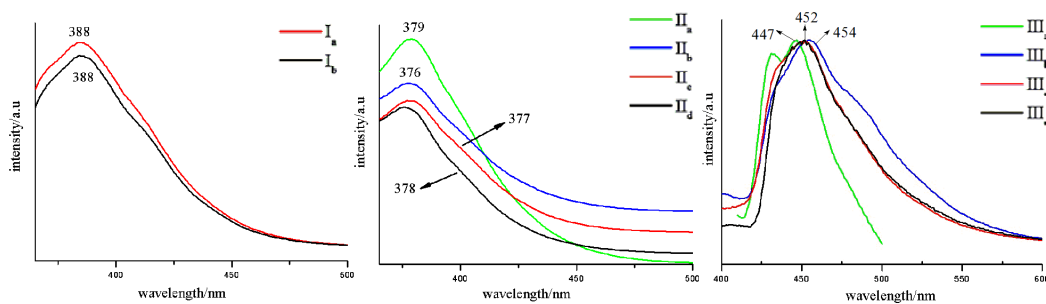

**Figure S6.** Fluorescence spectra ( $\lambda_{\text{exc}}=365\text{ nm}$ ) in cyclohexane solution for all forms.

**Table S1.** Total puckering Amplitude Q value and torsion angles in these forms.

| Forms                                                        | I <sub>a</sub> | I <sub>b</sub> | II <sub>b</sub> | II <sub>c</sub> | II <sub>d</sub> | III <sub>b</sub> | III <sub>d</sub> |
|--------------------------------------------------------------|----------------|----------------|-----------------|-----------------|-----------------|------------------|------------------|
| Total puckering Amplitude Q for anthracene or pyrene rings/Å | 0.219(8)       | 0.215(3)       | 0.142(5)        | 0.122(8)        | 0.122(4)        | 0.050(3)         | 0.098(5)         |
| O-C(carbonyl)-C-C(ethenyl) torsion angles(°)                 | 9.8(9)         | 44.5(4)        | 13.1(5)         | -19.8(11)       | -13.1(6)        | 12.8(5)          | 5.3(7)           |
| C-C(=O)-C-C(ethenyl) torsion angles(°)                       | -169.2(6)      | -137.5(3)      | -167.4(3)       | 159.2(7)        | 167.1(3)        | -165.4(3)        | 178.9(4)         |
| C-O(methoxy group)-C-C torsion angles(°)                     | -1.2(8)        | 2.9(3)         | /               | /               | /               | -6.7(4)          | -2.3(6)          |

**Table S1.** Total puckering Amplitude Q value and torsion angles in these forms.**Table S2.** Melting point, enthalpy and decomposition temperature rang of all crystals.

| Chalcone                      | I              |                | II              |                 |                 |                 |
|-------------------------------|----------------|----------------|-----------------|-----------------|-----------------|-----------------|
|                               | I <sub>a</sub> | I <sub>b</sub> | II <sub>a</sub> | II <sub>b</sub> | II <sub>c</sub> | II <sub>d</sub> |
| Form                          |                |                |                 |                 |                 |                 |
| Melting point / °C            | 139            | 167            | 125             | 149             | 147             | 120,125         |
| Enthalpy/J·g <sup>-1</sup>    | 63.16          | 87.55          | 63.86           | 73.58           | 39.12           | 52.19           |
| Decomposition temperature/ °C | 250-380        | 230-340        | 230-350         | 200-300         | 200-300         | 230-350         |

| Chalcone                      | III              |                  |                  |                  |
|-------------------------------|------------------|------------------|------------------|------------------|
|                               | III <sub>a</sub> | III <sub>b</sub> | III <sub>c</sub> | III <sub>d</sub> |
| Form                          |                  |                  |                  |                  |
| melting point / °C            | 147              | 154              | 162              | 150              |
| Enthalpy/J·g <sup>-1</sup>    | 64.85            | 66.67            | 40.83            | 58.55            |
| Decomposition temperature/ °C | 260-370          | 250-380          | 320-420          | 270-380          |

**Table S3.** The maximum absorption and emission peak of all solids.

| Forms                    | I <sub>a</sub> | I <sub>b</sub> | II <sub>a</sub> | II <sub>b</sub> | II <sub>c</sub> | II <sub>d</sub> | III <sub>a</sub> | III <sub>b</sub> | III <sub>c</sub> | III <sub>d</sub> |
|--------------------------|----------------|----------------|-----------------|-----------------|-----------------|-----------------|------------------|------------------|------------------|------------------|
| $\lambda_{max}^{ab}$ /nm | 447            | 433            | 485             | 453             | 443             | 455             | 638              | 676              | 570              | 568              |
| $\lambda_{max}^{em}$ /nm | 495            | /              | 545             | /               | /               | 501, 526        | /                | 577, 603         | /                | 583              |
